# Supplementary material
Source: PubMed Central journal article supplement (PMC6298121)
Supplement: pnas.1809326115.sapp.pdf [file pnas.1809326115.sapp.pdf]

## Supplementary Information for

Narrow thermal tolerance and low dispersal drive higher speciation in tropical mountains

Nicholas R. Polato, Brian A. Gill, Alisha A. Shah, Miranda M. Gray, Kayce L. Casner, Antoine Barthelet, Philipp W. Messer, Mark P. Simmons, Juan M. Guayasamin, Andrea C. Encalada, Boris C. Kondratieff, Alexander S. Flecker, Steven A. Thomas, Cameron K. Ghalambor, N. LeRoy Poff, W. Chris Funk, Kelly R. Zamudio

Corresponding Author: Kelly R. Zamudio  
Email: [kelly.zamudio@cornell.edu](mailto:kelly.zamudio@cornell.edu)

**This PDF file includes:**

Figs. S1 to S5  
Tables S1 to S3

**Other supplementary materials for this manuscript include the following:**

Datasets S1 to S3

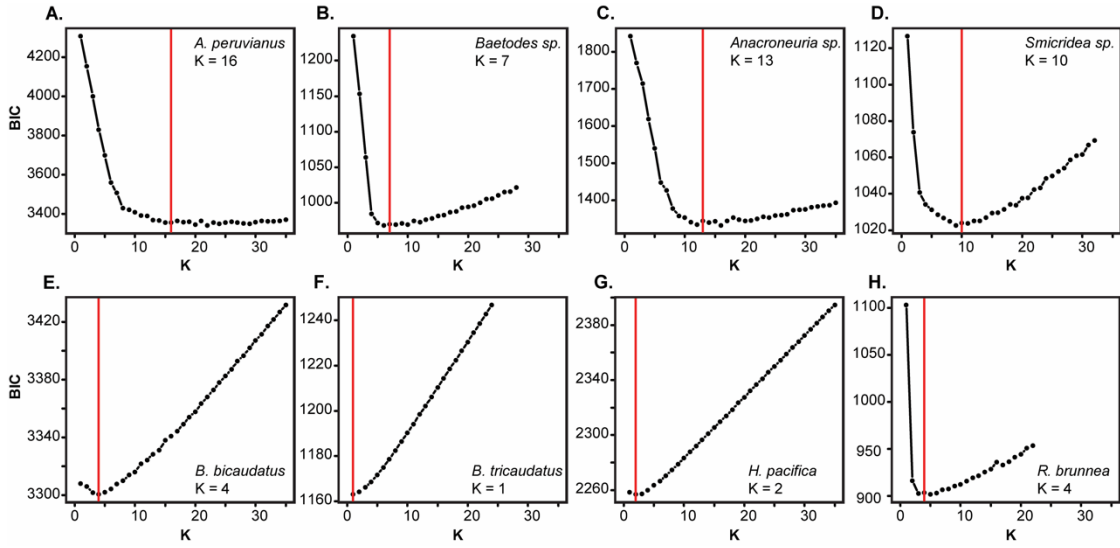

**Fig. S1**

Plots of Bayesian information content (BIC) for each proposed number of population subclusters (K) for each MTU from Ecuador (**A-D**) and Colorado (**E-H**). Best values of K (indicated by red lines) were consistently higher in tropical MTUs, indicating greater population structure and divergence in tropical montane habitats.

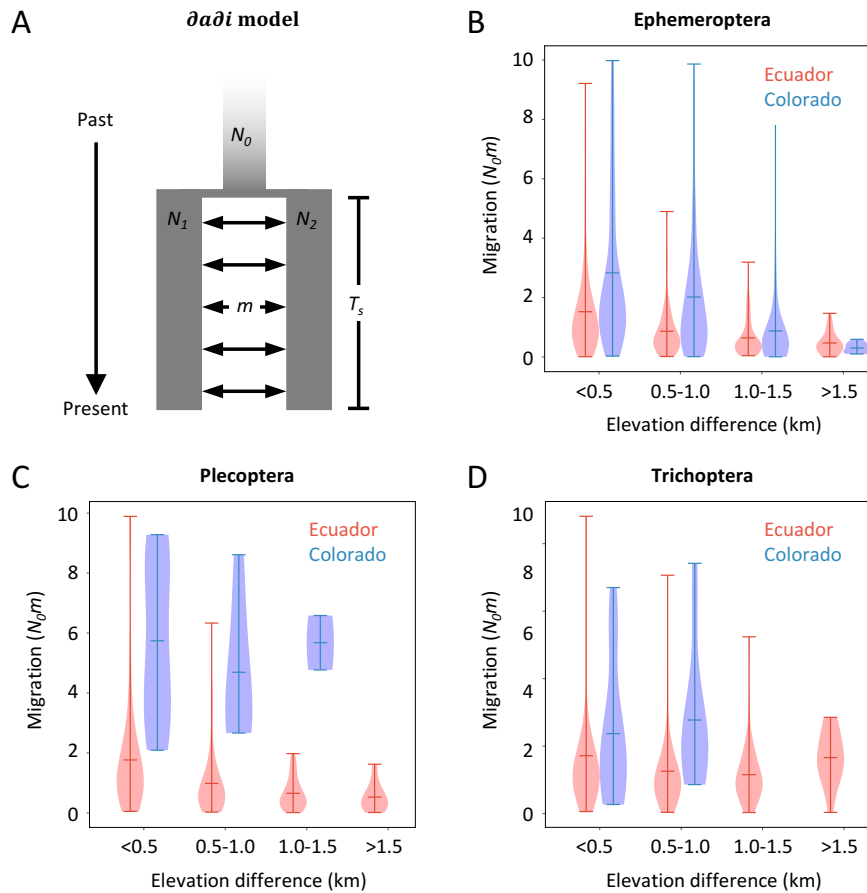

**Fig. S2**

(A) The demographic model used for all *∂a∂i* analyses for estimating effective numbers of migrants per generation between population pairs for eight focal MTUs in Ecuador and Colorado. In this model the ancestral population of constant effective size  $N_0$  splits at time  $T_s$  into two subpopulations of constant effective size  $N_1$  and  $N_2$ , linked by constant symmetric migration occurring at rate  $m$  after the split. (B-D) Effective migration rates between population pairs as a function of elevation difference between the populations, shown separately for MTUs within each of the three clades. Migration rates were consistently higher among temperate populations compared to tropical ones.

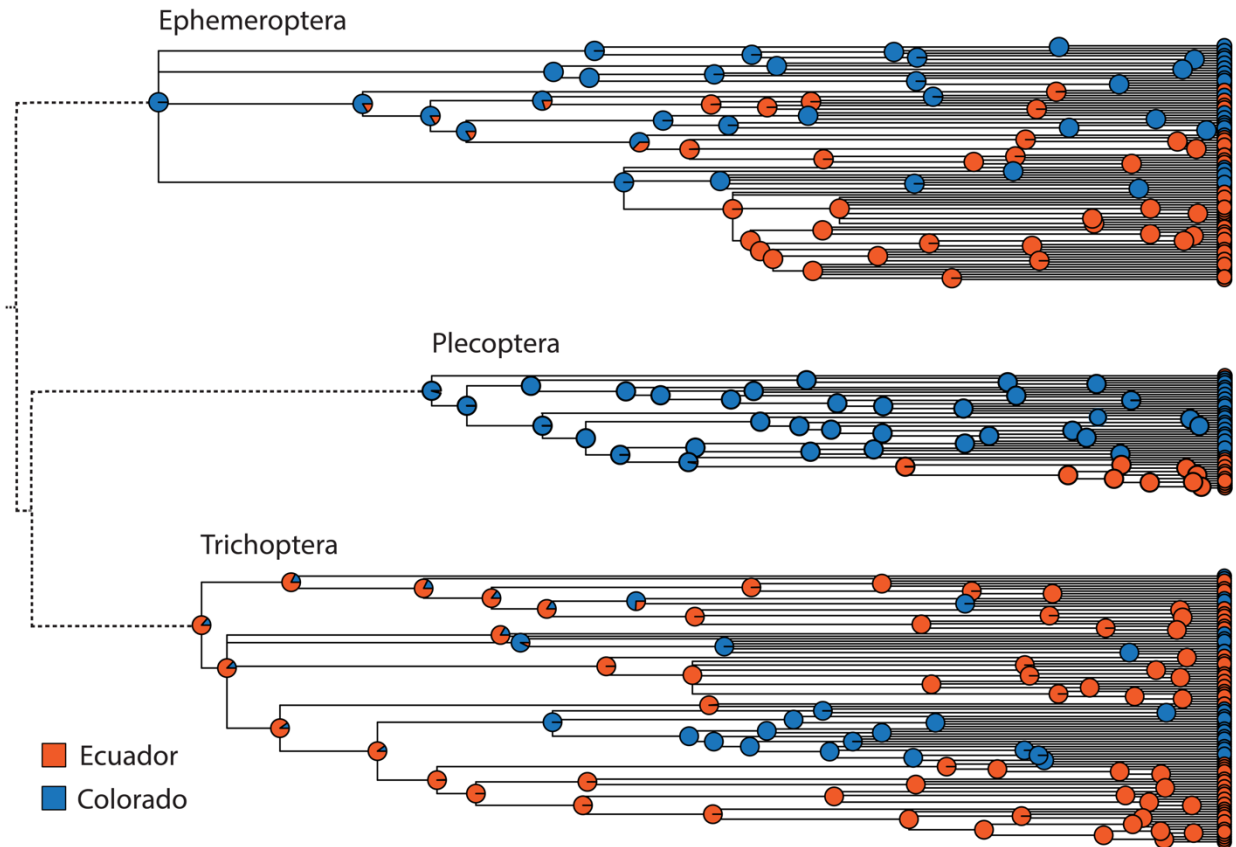

**Fig. S3**

Stochastic character mapping of latitude estimated independently for barcoded species in each clade. We determined the best-fit model for each character transition matrix using a likelihood ratio test and then estimated 10,000 stochastic character maps for each major clade. To summarize mappings, pie charts on internal nodes indicate posterior probabilities for historical locations of ancestors for all barcoded species from Ecuador and Colorado. Dotted lines connecting major clades show accepted relationships based on the aquatic insect systematics literature.

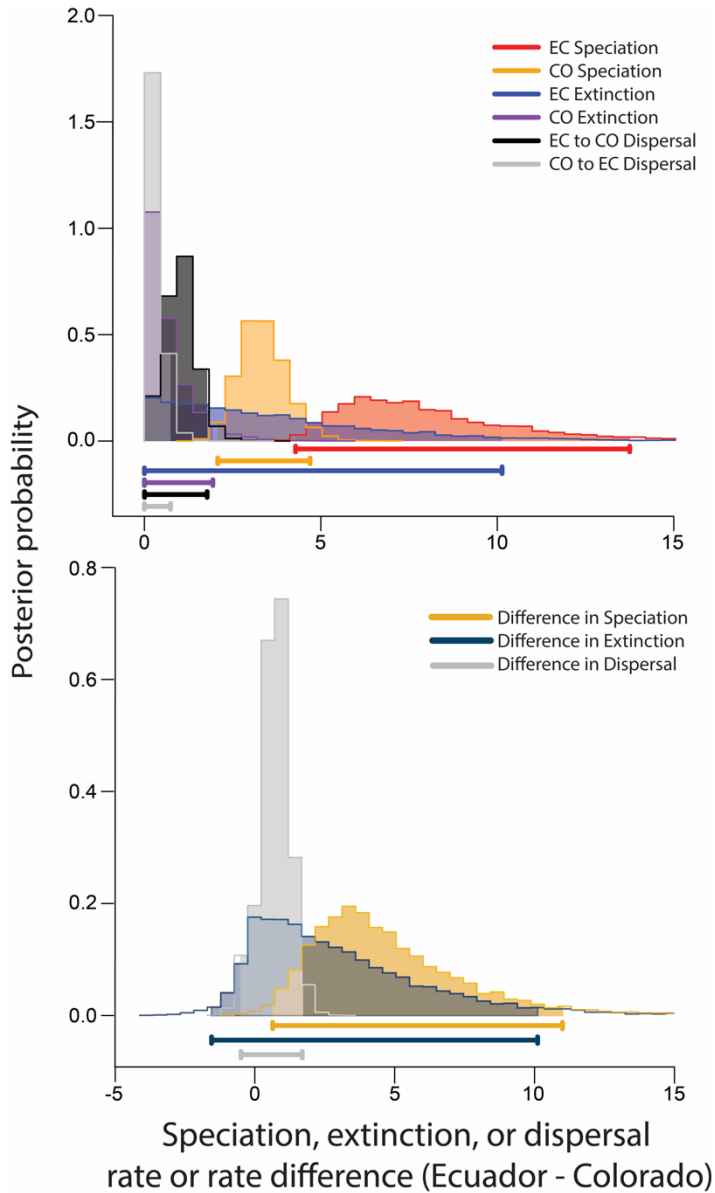

**Fig. S4**

Posterior probability densities for full BiSSE model parameters and latitudinal difference in parameters (Ecuador - Colorado) estimated based on 10,000 generations of Bayesian MCMC, for all barcoded species analyzed together. Line plots paralleling x-axis indicate 95% credibility intervals for parameter estimates and latitudinal differences in parameter estimates.

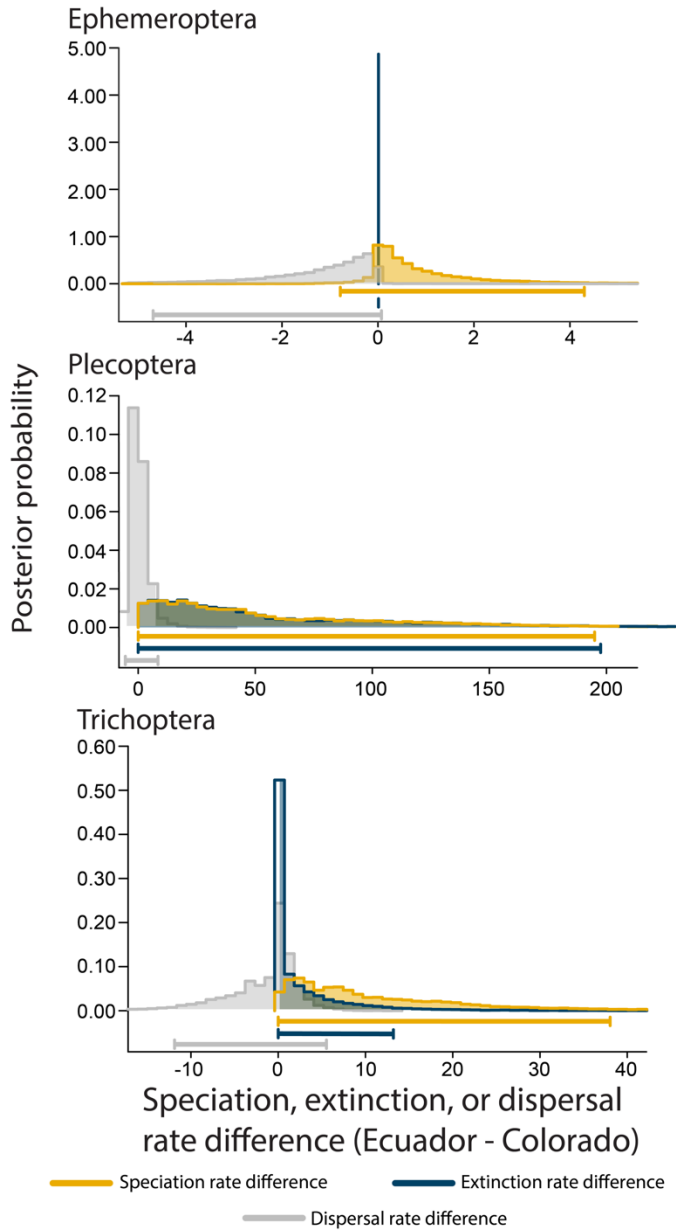

**Fig. S5**

Posterior probability densities for latitudinal difference in full BISSE model parameters estimated based on the maximum-likelihood fits of 20,000 post burn-in trees, independently for barcoded species in each major clade. Line plots paralleling x-axis indicate 95% credibility intervals for latitudinal differences in parameter estimates.

**Table S1.** Critical thermal maximum, minimum, and acclimation temperatures for barcoded species in three focal clades (Ephemeroptera, Plecoptera, Trichoptera) of aquatic insects sampled along temperate and tropical elevational gradients.

| LATITUDE | ELEVATION (m) | ELEVATION CLASS | ORDER         | GENUS               | SPECIES              | ACCLIMATION TEMP. (°C) | AVG. CT <sub>MAX</sub> (°C) | AVG. CT <sub>MIN</sub> (°C) |
|----------|---------------|-----------------|---------------|---------------------|----------------------|------------------------|-----------------------------|-----------------------------|
| Colorado | 1992          | Low             | Ephemeroptera | <i>Baetis</i>       | <i>flavistriga</i>   | 14                     | 34.1                        | 0.2                         |
| Colorado | 2212          | Low             | Ephemeroptera | <i>Dipheter</i>     | <i>hageni</i>        | 14                     | 33.0                        | 0.4                         |
| Colorado | 2212          | Low             | Ephemeroptera | <i>Baetis</i>       | <i>bicaudatus</i>    | 14                     | 29.4                        | 0.6                         |
| Colorado | 2212          | Low             | Ephemeroptera | <i>Baetis</i>       | <i>tricaudatus</i>   | 14                     | 29.4                        | 0.4                         |
| Colorado | 2590          | Mid             | Ephemeroptera | <i>Baetis</i>       | <i>tricaudatus</i>   | 10                     | 31.6                        | 0.5                         |
| Colorado | 2590          | Mid             | Ephemeroptera | <i>Baetis</i>       | <i>tricaudatus B</i> | 10                     | 28.1                        | 0.8                         |
| Colorado | 2798          | Mid             | Ephemeroptera | <i>Amaletus</i>     | <i>celer</i>         | 10                     | 29.1                        | 0.3                         |
| Colorado | 2798          | Mid             | Ephemeroptera | <i>Drunella</i>     | <i>doddsii</i>       | 10                     | 28.2                        | 0.5                         |
| Colorado | 2798          | Mid             | Ephemeroptera | <i>Baetis</i>       | <i>bicaudatus</i>    | 10                     | 27.1                        | 0.3                         |
| Colorado | 3166          | High            | Ephemeroptera | <i>Baetis</i>       | <i>bicaudatus</i>    | 6                      | 29.0                        | 0.5                         |
| Colorado | 1992          | Low             | Plecoptera    | <i>Hesperoperla</i> | <i>pacifica</i>      | 14                     | 33.9                        | 0.3                         |
| Colorado | 2212          | Low             | Plecoptera    | <i>Hesperoperla</i> | <i>pacifica</i>      | 14                     | 31.1                        | 0.6                         |
| Colorado | 2590          | Mid             | Plecoptera    | <i>Hesperoperla</i> | <i>pacifica</i>      | 10                     | 33.2                        | 0.9                         |
| Colorado | 2798          | Mid             | Plecoptera    | <i>Megarcys</i>     | <i>signata B</i>     | 10                     | 29.8                        | 0.4                         |
| Colorado | 2798          | Mid             | Plecoptera    | <i>Kogotus</i>      | <i>modestus</i>      | 10                     | 28.6                        | 0.4                         |
| Colorado | 3166          | High            | Plecoptera    | <i>Kogotus</i>      | <i>modestus</i>      | 6                      | 27.7                        | 0.4                         |
| Colorado | 3166          | High            | Trichoptera   | <i>Rhyacophila</i>  | <i>hyalinata</i>     | 6                      | 25.1                        | 0.5                         |
| Ecuador  | 2003          | Low             | Ephemeroptera | <i>Baetodes</i>     | <i>sp. E</i>         | 14                     | 22.0                        | 6.6                         |
| Ecuador  | 2003          | Low             | Ephemeroptera | <i>Leptohyphes</i>  | <i>sp. G</i>         | 14                     | 22.2                        | 5.7                         |
| Ecuador  | 2003          | Low             | Ephemeroptera | <i>Baetodes</i>     | <i>sp. M</i>         | 14                     | 19.6                        | 7.8                         |

|         |      |      |               |                     |                     |    |      |      |
|---------|------|------|---------------|---------------------|---------------------|----|------|------|
| Ecuador | 2694 | Mid  | Ephemeroptera | <i>Andesiops</i>    | <i>sp. A</i>        | 10 | 25.4 | 2.9  |
| Ecuador | 2694 | Mid  | Ephemeroptera | <i>Andesiops</i>    | <i>sp. C</i>        | 10 | 24.6 | 2.5  |
| Ecuador | 2694 | Mid  | Ephemeroptera | <i>Andesiops</i>    | <i>sp. D</i>        | 10 | 26.3 | 2.7  |
| Ecuador | 2694 | Mid  | Ephemeroptera | <i>Andesiops</i>    | <i>sp. G</i>        | 10 | 26.7 | 2.9  |
| Ecuador | 2694 | Mid  | Ephemeroptera | <i>Baetodes</i>     | <i>sp. H</i>        | 10 | 26.2 | 3.4  |
| Ecuador | 2694 | Mid  | Ephemeroptera | <i>Prebaetodes</i>  | <i>sp. B</i>        | 10 | 24.2 | 3.1  |
| Ecuador | 2694 | Mid  | Ephemeroptera | <i>Myobaetis</i>    | <i>sp. D</i>        | 10 | 26.9 | 2.7  |
| Ecuador | 2694 | Mid  | Ephemeroptera | <i>Baetodes</i>     | <i>inconclusive</i> | 10 | 22.7 | 3.7  |
| Ecuador | 3387 | High | Ephemeroptera | <i>Andesiops</i>    | <i>sp. A</i>        | 6  | 25.7 | 0.1  |
| Ecuador | 3387 | High | Ephemeroptera | <i>Andesiops</i>    | <i>sp. C</i>        | 6  | 28.6 | -0.2 |
| Ecuador | 3387 | High | Ephemeroptera | <i>Andesiops</i>    | <i>sp. E</i>        | 6  | 28.7 | 0    |
| Ecuador | 1845 | Low  | Plecoptera    | <i>Anacroneuria</i> | <i>guambiana B</i>  | 14 | 28.6 | 4.6  |
| Ecuador | 1845 | Low  | Plecoptera    | <i>Anacroneuria</i> | <i>rawlinsi</i>     | 14 | 30.3 | 4.7  |
| Ecuador | 2003 | Low  | Plecoptera    | <i>Anacroneuria</i> | <i>complex B</i>    | 14 | 28.8 | 4.6  |
| Ecuador | 2003 | Low  | Plecoptera    | <i>Anacroneuria</i> | <i>guambiana C</i>  | 14 | 29.0 | 4.5  |
| Ecuador | 2003 | Low  | Plecoptera    | <i>Anacroneuria</i> | <i>sp. D</i>        | 14 | 29.4 | 4.7  |
| Ecuador | 2694 | Mid  | Plecoptera    | <i>Anacroneuria</i> | <i>cajas A</i>      | 10 | 27.3 | 1.1  |
| Ecuador | 2694 | Mid  | Plecoptera    | <i>Anacroneuria</i> | <i>guambiana A</i>  | 10 | 27.5 | 1.1  |
| Ecuador | 2003 | Low  | Trichoptera   | <i>Leptonema</i>    | <i>sp. B</i>        | 14 | 26.5 | 5.5  |
| Ecuador | 2694 | Mid  | Trichoptera   | <i>Leptonema</i>    | <i>sp. D</i>        | 10 | 26.7 | 2.8  |



**Table S2.** Phylogenetically paired MTUs within three focal clades (Ephemeroptera [E], Plecoptera [P], Trichoptera [T]) of aquatic insects included in genomic comparisons across latitudes. Sample sizes, ddRAD sequencing results, and final loci and individuals retained after bioinformatic filtering for each MTU.

|          | Taxon (MTU)                  | Order | N inds | Mean coverage depth | Total N of merged stacks | N loci MAF >0.01 | N loci MAF >0.05 | % inds retained | N inds retained | N loci retained |
|----------|------------------------------|-------|--------|---------------------|--------------------------|------------------|------------------|-----------------|-----------------|-----------------|
| Colorado | <i>Baetis bicaudatus</i>     | E     | 606    | 71                  | 7,026                    | 10,058           | 7,767            | 99%             | 603             | 3,100           |
|          | <i>Baetis tricaudatus</i>    | E     | 316    | 62                  | 5,354                    | 9,141            | 7,098            | 77%             | 245             | 1,272           |
|          | <i>Hesperoperla pacifica</i> | P     | 404    | 39                  | 15,717                   | 17,436           | 13,520           | 95%             | 383             | 4,544           |
|          | <i>Rhyacophila brunnea</i>   | T     | 399    | 46                  | 6,175                    | 8,847            | 7,366            | 56%             | 222             | 870             |
| Ecuador  | <i>Andesiops peruvianus</i>  | E     | 990    | 64                  | 5,447                    | 8,450            | 6,963            | 88%             | 877             | 1,378           |
|          | <i>Baetodes sp</i>           | E     | 401    | 66                  | 7,164                    | 7,801            | 6,461            | 68%             | 275             | 848             |
|          | <i>Anacroneuria sp</i>       | P     | 598    | 30                  | 14,104                   | 23,977           | 21,260           | 65%             | 391             | 1,021           |
|          | <i>Smicridea sp</i>          | T     | 614    | 23                  | 16,027                   | 9,748            | 7,891            | 52%             | 319             | 419             |

**Table S3.**

Linear mixed effects model results using genetic distance (Dc) as the response variable, and geographic distance and elevation difference as predictors. Taxonomic membership (Ephemeroptera, Plecoptera, Trichoptera) was nested within latitude as a random effect. Geographic distance and/or latitude were significant predictors of genetic differences, and the significant interactions between latitude and both geographic distance and elevation difference showed that temperate and tropical populations do not respond equally to elevation differences in terms of genetic differentiation.

|          |                              | Estimate | Std.Error | t-value | p-value          |
|----------|------------------------------|----------|-----------|---------|------------------|
| All Taxa | (Intercept)                  | 0.219    | 0.011     | 20.255  | <b>&lt;0.001</b> |
|          | Geographic Dist.             | 0.001    | 0.000     | 2.542   | <b>0.011</b>     |
|          | Latitude                     | 0.099    | 0.011     | 9.331   | <b>&lt;0.001</b> |
|          | Elevation Diff.              | -0.000   | 0.000     | -0.731  | 0.465            |
|          | Geo. Dist. x Elevation Diff. | -0.001   | 0.001     | -2.511  | <b>0.012</b>     |
|          | Latitude x Elev. Diff.       | 0.000    | 0.000     | 5.762   | <b>&lt;0.001</b> |

**Dataset S1 (excel file)**

Site information for stream temperature measurements, physiology, landscape genomics, and regional diversity surveys. An "X" indicates that data for particular project component were collected at a site.

**Dataset S2 (excel file)**

Taxonomic identifications by latitude and sampling site determined using morphology (Morphological Taxonomic Units; MTUs) and DNA barcoding (Barcode Species). Taxa lists for both types of classifications are provided. These records, and their associated Barcode Index Numbers (BINs), are from the Barcode of Life Database (<http://www.boldsystems.org>) dataset "Thermal tolerance and dispersal drive diversification" (DS-TTADDD; [dx.doi.org/10.5883/DS-TTADDD](https://doi.org/10.5883/DS-TTADDD)).

**Dataset S3 (excel file)**

Documentation of information used to determine constraints for supertree topology for analysis of diversification. Node reference numbers refer to subsequent tabs within dataset with figures describing constrained nodes within supertree (organized by order). Citations detail sources of phylogenetic information. Data describes the type of information with relevant figure numbers, nodal support type, and nodal support values from the aquatic insect systematics literature.
